# Supplementary material for: Presence and molecular characterization of Cryptosporidium and Giardia in recreational lake water in Tianjin, China: a preliminary study
Source: PubMed Central journal article supplement (PMC5799358; doi:10.1038/s41598-018-20902-3), 2018-02-05
Supplement: 41598_2018_20902_MOESM1_ESM.pdf [file 41598_2018_20902_MOESM1_ESM.pdf]

1 **Supplemental Material for**

2 **“Presence and molecular characterization of *Cryptosporidium* and**  
3 ***Giardia* in recreational lake water in Tianjin, China: a preliminary**  
4 **study”**

5 **Shumin Xiao<sup>1,2,\*</sup>, Yan Zhang<sup>1</sup>, Xiaoyun Zhao<sup>1</sup>, Liping Sun<sup>1</sup>, Sike Hu<sup>3,\*</sup>**

6  
7 <sup>1</sup> School of Environmental and Municipal Engineering, Tianjin Chengjian University,  
8 Tianjin 300384, PR China

9 <sup>2</sup> Tianjin Key Laboratory of Aquatic Science and Technology, Tianjin 300384, PR China

10 <sup>3</sup> School of Medicine, Nankai University, Tianjin 300071, PR China

11 \* **Correspondence:** xiaoshumin@tcu.edu.cn (S.X.), Tel.: +86-22-23085117; huskie@126.com  
12 (S.H.)

13

14

15 Pages S1–S4

16 Figure S1

17 Table S1–S2

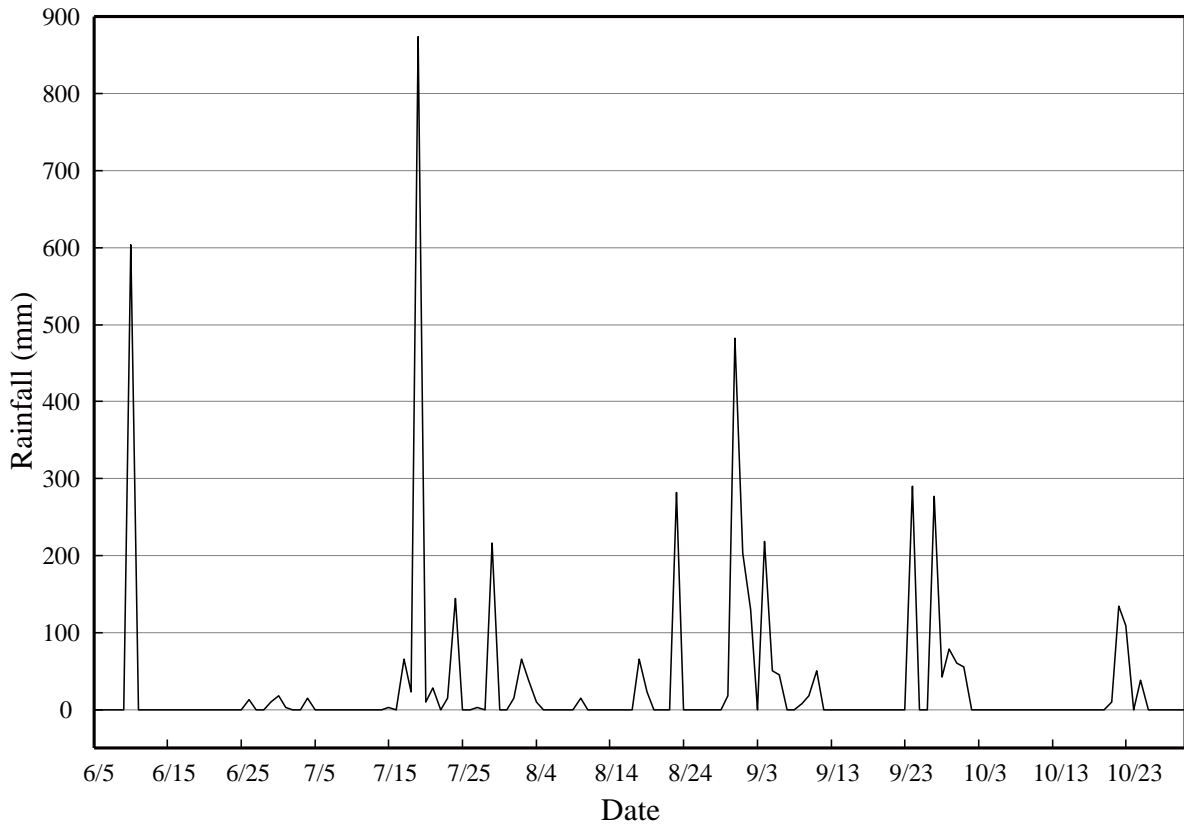

18

19 **Figure S1** Daily rainfalls in Tianjin, China from the beginning of June to the end of  
20 October, 2015.

21 **Table S1.** Initial precision and recovery (IPR) test of *Cryptosporidium* oocysts and  
 22 *Giardia* cysts for the method used.

| <b>Protozoa</b>               | <b>Spiked number</b> | <b>Recovered number<br/>(n=4)</b> | <b>Recovery (range)<br/>(%)</b> | <b>Relative standard<br/>deviation (%)</b> |
|-------------------------------|----------------------|-----------------------------------|---------------------------------|--------------------------------------------|
| <i>Cryptosporidium</i> oocyst | 120                  | 49.5 (56, 39, 42, 61)             | 41.25 (32.50–50.83)             | 21.54                                      |
| <i>Giardia</i> cyst           | 137                  | 52.5 (63, 37, 45, 65)             | 38.32 (27.01–47.45)             | 26.09                                      |

23

24 **Table S2.** Primers and conditions of the PCR reaction used in this study for  
 25 amplification of *Cryptosporidium* and *Giardia* at SSU rRNA gene loci.

| Parasite       |     | PCR Primers                                                                             | PCR Parameters                                                                          |
|----------------|-----|-----------------------------------------------------------------------------------------|-----------------------------------------------------------------------------------------|
| <i>Crypto.</i> | 1st | CPB-DIAGF:5'-AAGCTCGTAGTTGGATTTCTG-3'<br>CPB-DIAGR:5'-TAAGGTGCTGAAGGAGTAAGG-3'          | 7 min at 94 °C followed by 35 cycles of 30 s at 94 °C , 60 s at 68 °C and 30 s at 72 °C |
|                | 2nd | N-DIAGF2:5'-CAATTGGAGGGCAAGTCTGGTGCCAGC-3'<br>N-DIAGR2:5'-CCTTCCTATGTCTGGACCTGGTGAGT-3' | 7 min at 94 °C followed by 35 cycles of 30 s at 94 °C , 60 s at 60 °C and 30 s at 72 °C |
| <i>Giardia</i> | 1st | GiaF:5'-AAGTGTGGTGCAGACGGACTC-3'<br>GiaR:5'-CTGCTGCCGTCCTTGGATGT-3'                     | 5 min at 94 °C followed by 35 cycles of 45 s at 96 °C , 30 s at 55 °C and 45 s at 72 °C |
|                | 2nd | RH11:5'-CATCCGGTTCGATCCTGCC-3'<br>RH4:5'-AGTCGAACCTGATTCTCCGCCAGG-3'                    | 3 min at 96 °C followed by 35 cycles of 45 s at 96 °C , 30 s at 59 °C and 30 s at 72 °C |

26
